# Supplementary material for: Double Perovskite LaFe1−xNixO3 Coated with Sea Urchin-like Gold Nanoparticles Using Electrophoresis as the Photoelectrochemical Electrode to Enhance H2 Production via Surface Plasmon Resonance Effect
Source: MDPI journal article supplement (doi:10.3390/nano12040622), 2022-02-12
Supplement: s1 [file s1]

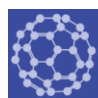

## Supplementary Material

# Double Perovskite $\text{LaFe}_{1-x}\text{Ni}_x\text{O}_3$ Coated with Sea Urchin-like Gold Nanoparticles Using Electrophoresis as the Photoelectrochemical Electrode to Enhance $\text{H}_2$ Production via Surface Plasmon Resonance Effect

Hsiang-Wei Tsai and Yen-Hsun Su \*

Department of Materials Science and Engineering, National Cheng-Kung University, 701401, Taiwan;  
n58064026@gs.ncku.edu.tw

\* Correspondence: yhsu@ncku.edu.tw; Tel.: +886-6-275-7575 (ext. 62941)

**Table S1.** Particle sizes of the raw LFNO samples with different Ni concentrations.

| Sample    | Size ( $\mu\text{m}$ ) |
|-----------|------------------------|
| 0.00 mole | $4.72 \pm 0.34$        |
| 0.01 mole | $7.25 \pm 0.80$        |
| 0.03 mole | $7.35 \pm 0.85$        |
| 0.05 mole | $7.63 \pm 0.81$        |
| 0.07 mole | $7.82 \pm 0.80$        |

**Table S2.** UV-vis properties of the raw and Au-coated LFNO samples with different Ni concentrations.

| Sample   | LFNO       |                              | Au-coated LFNO |                              |
|----------|------------|------------------------------|----------------|------------------------------|
|          | $E_g$ (eV) | Wavelength ( $\mu\text{m}$ ) | PE (eV)        | Wavelength ( $\mu\text{m}$ ) |
| 0.00 mol | 2.21       | 561.1                        | 2.08           | 596.2                        |
| 0.01 mol | 2.20       | 563.6                        | 2.05           | 604.9                        |
| 0.03 mol | 2.12       | 584.9                        | 2.04           | 607.8                        |
| 0.05 mol | 2.09       | 593.3                        | 2.02           | 613.9                        |
| 0.07 mol | 2.05       | 604.9                        | 1.99           | 623.1                        |

**Table S3.** Electrochemical properties of the raw LFNO samples with different Ni concentrations in 0.1 M KOH solution.

| Sample   | $E_p^a$ (V) | $E_p^c$ (V) | HER (V) |
|----------|-------------|-------------|---------|
| 0.00 mol | 0.003       | −0.002      | 0.83    |
| 0.01 mol | 0.368       | −0.286      | 0.67    |
| 0.03 mol | 0.194       | −0.239      | 0.66    |
| 0.05 mol | 0.272       | −0.318      | 0.71    |
| 0.07 mol | 0.156       | −0.475      | 0.82    |

**Table S4.** Hydrogen efficiency and real production of the Au-coated LFNO samples with different Ni concentrations in ethanol under AM 1.5 G at different temperatures.

| Sample   | $V_{op}$ (V) | 0 °C                               |                                 |                                                            |
|----------|--------------|------------------------------------|---------------------------------|------------------------------------------------------------|
|          |              | $I_{op}$<br>( $\times 10^{-4}$ mA) | $\eta$<br>( $\times 10^{-3}$ %) | Real production<br>( $\mu\text{mol g}^{-1}\text{h}^{-1}$ ) |
| 0.00 mol | 0.002        | 1.12                               | 1.37                            | 4478.0                                                     |

| 0.01 mol | 0.004               | 1.08                                      | 1.32                       | 4314.6                                                     |
|----------|---------------------|-------------------------------------------|----------------------------|------------------------------------------------------------|
| 0.03 mol | 0.009               | 1.05                                      | 1.29                       | 4216.5                                                     |
| 0.05 mol | 0.005               | 1.05                                      | 1.28                       | 4183.8                                                     |
| 0.07 mol | 0.002               | 1.09                                      | 1.34                       | 4380.0                                                     |
| 10 °C    |                     |                                           |                            |                                                            |
| Sample   | V <sub>op</sub> (V) | I <sub>op</sub><br>(×10 <sup>-4</sup> mA) | η<br>(×10 <sup>-2</sup> %) | Real production<br>(μmol g <sup>-1</sup> h <sup>-1</sup> ) |
| 0.00 mol | 0.012               | 1.05                                      | 1.28                       | 41838.4                                                    |
| 0.01 mol | 0.014               | 1.10                                      | 1.34                       | 43800.0                                                    |
| 0.03 mol | 0.003               | 0.99                                      | 1.22                       | 39877.2                                                    |
| 0.05 mol | 0.005               | 1.06                                      | 1.30                       | 42492.1                                                    |
| 0.07 mol | 0.004               | 1.04                                      | 1.28                       | 41838.4                                                    |
| 20 °C    |                     |                                           |                            |                                                            |
| Sample   | V <sub>op</sub> (V) | I <sub>op</sub><br>(×10 <sup>-4</sup> mA) | η<br>(×10 <sup>-2</sup> %) | Real production<br>(μmol g <sup>-1</sup> h <sup>-1</sup> ) |
| 0.00 mol | 0.005               | 1.02                                      | 1.25                       | 40857.8                                                    |
| 0.01 mol | 0.004               | 1.01                                      | 1.24                       | 40530.9                                                    |
| 0.03 mol | 0.002               | 1.00                                      | 1.22                       | 39877.2                                                    |
| 0.05 mol | 0.002               | 0.97                                      | 1.19                       | 38896.6                                                    |
| 0.07 mol | 0.004               | 1.02                                      | 1.25                       | 40857.8                                                    |
| 30 °C    |                     |                                           |                            |                                                            |
| Sample   | V <sub>op</sub> (V) | I <sub>op</sub><br>(×10 <sup>-4</sup> mA) | η<br>(×10 <sup>-2</sup> %) | Real production<br>(μmol g <sup>-1</sup> h <sup>-1</sup> ) |
| 0.00 mol | 0.002               | 1.00                                      | 1.22                       | 39877.2                                                    |
| 0.01 mol | 0.001               | 0.97                                      | 1.20                       | 39223.5                                                    |
| 0.03 mol | 0.008               | 0.97                                      | 1.20                       | 39223.5                                                    |
| 0.05 mol | 0.002               | 0.96                                      | 1.18                       | 38569.7                                                    |
| 0.07 mol | 0.012               | 0.98                                      | 1.20                       | 39223.5                                                    |

**Table S5.** Hydrogen efficiency and real production of the Au-coated LFNO samples with different Ni concentrations in 1-butanol under AM 1.5G at different temperatures.

| 0 °C     |                     |                                           |                            |                                                            |
|----------|---------------------|-------------------------------------------|----------------------------|------------------------------------------------------------|
| Sample   | V <sub>op</sub> (V) | I <sub>op</sub><br>(×10 <sup>-4</sup> mA) | η<br>(×10 <sup>-3</sup> %) | Real production<br>(μmol g <sup>-1</sup> h <sup>-1</sup> ) |
| 0.00 mol | 0.001               | 9.21                                      | 1.13                       | 3693.5                                                     |
| 0.01 mol | 0.002               | 9.17                                      | 1.13                       | 3693.5                                                     |
| 0.03 mol | 0.001               | 9.36                                      | 1.15                       | 3759.9                                                     |
| 0.05 mol | 0.002               | 9.15                                      | 1.12                       | 3660.9                                                     |
| 0.07 mol | 0.010               | 9.53                                      | 1.16                       | 3791.6                                                     |
| 10 °C    |                     |                                           |                            |                                                            |
| Sample   | V <sub>op</sub> (V) | I <sub>op</sub><br>(×10 <sup>-4</sup> mA) | η<br>(×10 <sup>-3</sup> %) | Real production<br>(μmol g <sup>-1</sup> h <sup>-1</sup> ) |
| 0.00 mol | 0.004               | 9.15                                      | 1.12                       | 3660.9                                                     |
| 0.01 mol | 0.007               | 9.51                                      | 1.16                       | 3791.6                                                     |
| 0.03 mol | 0.003               | 9.14                                      | 1.12                       | 3660.9                                                     |
| 0.05 mol | 0.004               | 9.33                                      | 1.14                       | 3726.2                                                     |
| 0.07 mol | 0.011               | 9.14                                      | 1.11                       | 3628.2                                                     |
| 20 °C    |                     |                                           |                            |                                                            |
| Sample   | V <sub>op</sub> (V) | I <sub>op</sub>                           | η                          | Real production                                            |

|          |       | ( $\times 10^{-4}$ mA) | ( $\times 10^{-3}$ %) | ( $\mu\text{mol g}^{-1}\text{h}^{-1}$ ) |
|----------|-------|------------------------|-----------------------|-----------------------------------------|
| 0.00 mol | 0.005 | 9.24                   | 1.13                  | 3693.5                                  |
| 0.01 mol | 0.020 | 9.20                   | 1.11                  | 3628.2                                  |
| 0.03 mol | 0.010 | 9.27                   | 1.13                  | 3693.5                                  |
| 0.05 mol | 0.005 | 9.16                   | 1.13                  | 3693.5                                  |
| 0.07 mol | 0.002 | 9.06                   | 1.11                  | 3628.2                                  |

  

| 30 °C    |                     |                                           |                                 |                                                            |
|----------|---------------------|-------------------------------------------|---------------------------------|------------------------------------------------------------|
| Sample   | $V_{\text{op}}$ (V) | $I_{\text{op}}$<br>( $\times 10^{-4}$ mA) | $\eta$<br>( $\times 10^{-3}$ %) | Real production<br>( $\mu\text{mol g}^{-1}\text{h}^{-1}$ ) |
| 0.00 mol | 0.008               | 8.95                                      | 1.09                            | 3562.8                                                     |
| 0.01 mol | 0.005               | 9.17                                      | 1.12                            | 3660.9                                                     |
| 0.03 mol | 0.006               | 8.87                                      | 1.10                            | 3595.5                                                     |
| 0.05 mol | 0.003               | 8.95                                      | 1.10                            | 3595.5                                                     |
| 0.07 mol | 0.008               | 8.95                                      | 1.09                            | 3562.8                                                     |

**Table S6.** Activation energy,  $E_a$ , of the Au-coated LFNO samples with different Ni concentrations in ethanol and 1-butanol.

| Sample   | $E_a$ (eV) |           |
|----------|------------|-----------|
|          | ethanol    | 1-butanol |
| 0.00 mol | −0.080     | −0.056    |
| 0.01 mol | −0.068     | −0.055    |
| 0.03 mol | −0.063     | −0.059    |
| 0.05 mol | −0.068     | −0.057    |
| 0.07 mol | −0.065     | −0.058    |

**Table S7.** Parameters of the energy-level diagram (vs. vacuum) of the raw LFNO samples with different Ni concentrations.

| Sample   | $E_g$ (eV) | $E_{\text{VB}}$ (eV) | $E_{\text{CB}}$ (eV) | $E_{\text{FB}}$ (eV) | Carrier density ( $\times 10^{19} / \text{cm}^3$ ) |
|----------|------------|----------------------|----------------------|----------------------|----------------------------------------------------|
| 0.00 mol | 2.21       | −6.18                | −3.97                | −4.50                | 4.33                                               |
| 0.01 mol | 2.20       | −6.32                | −4.12                | −4.31                | 3.70                                               |
| 0.03 mol | 2.12       | −5.96                | −3.84                | −4.39                | 3.30                                               |
| 0.05 mol | 2.09       | −5.97                | −3.88                | −4.58                | 4.03                                               |
| 0.07 mol | 2.05       | −6.08                | −4.03                | −4.69                | 4.76                                               |
